# Supplementary material for: Efficient gene targeting in soybean using Ochrobactrum haywardense-mediated delivery of a marker-free donor template
Source: PubMed Central journal article supplement — Plant Physiol. 2022 Feb 22;189(2):585–94. doi: 10.1093/plphys/kiac075 (PMC9157123; doi:10.1093/plphys/kiac075), 2022-02-22
Supplement: kiac075_supplementary_data.pdf [file kiac075_supplementary_data.pdf]

A.

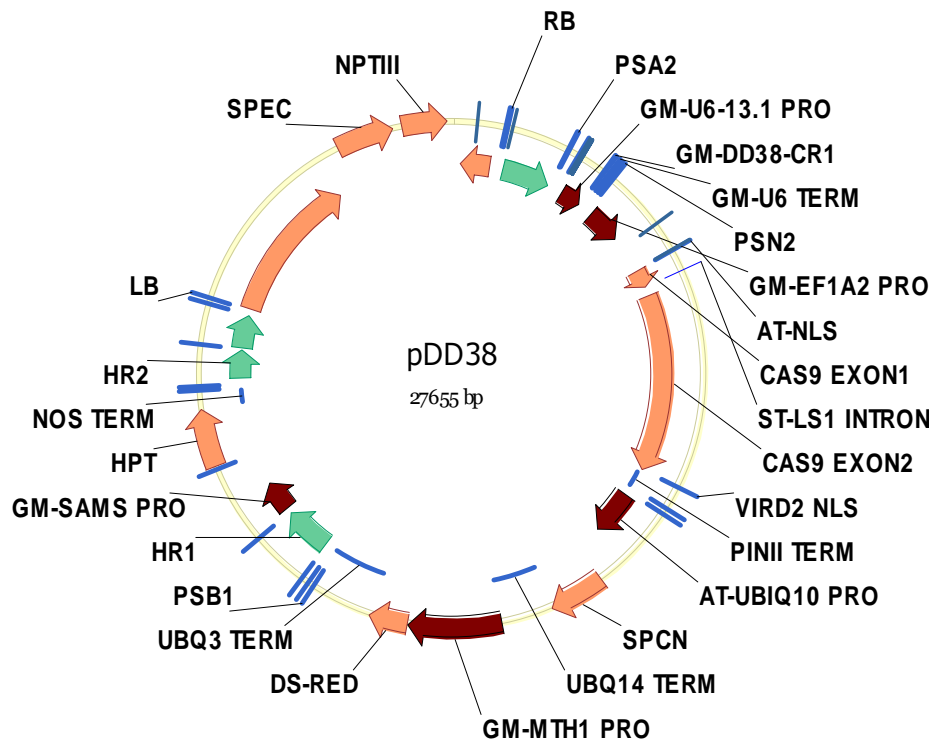

B.

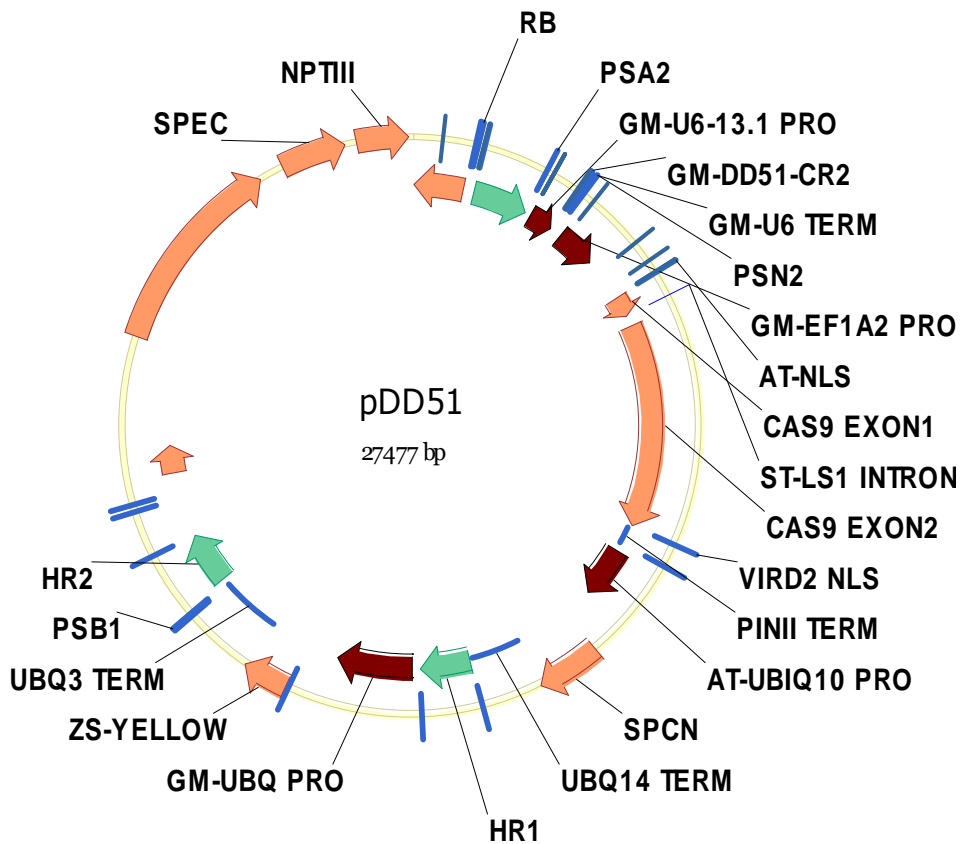

**Supplementary Figure S1.** Plasmid maps of the constructs pDD38 (A) and pDD51 (B) containing donor template for gene targeting at soybean DD38 and DD51 genomic site, respectively. The full description of the elements is given in Supplementary Table 1.

**Supplementary Figure S2:** Guide RNA spacer and homology sequences used in pDD38 and pDD51 plasmids. GM-DD38-CR1 and GM-DD51-CR2 are the 20-21 bp targeting spacer sequences of a guide RNA targeting the DD38 and DD51 sites on chromosome 4 as shown in supplementary Figure 1 and described in supplementary Table 1. HR1:DD38 and HR2:DD38 are Homology arm1 and Homology arm2 sequences of DD38, respectively. Similarly, HR1:DD51 and HR2:DD51 are Homology arm1 and Homology arm2 sequences of DD51, respectively. The physical and genetic locations of DD38 and DD51 sites are described in the Materials and Method section.

**GM-DD38-CR1**

GGTGCTAAGCACGACATCCA

**HR1:DD38**

CGACCCAGTGATGGCAACTAAGTGGATCAACAGCAACTTTTGTCCGATTTGCGATATAATTTGTCAAAACATGC  
CTCTAAAATCACTCTAACATCAAATTTCTGAATAACAATTTTATACACTCCCCTCCTCCAACCTTGTTATGTGCCCTTC  
TGACCCTTCTGTTTTGTTTGCTAGTTAACCATGTAGGAAAAAGTATCACTCCACTCAATAGTATTTTCACTTCATCT  
GGCATAAATAATTTTGGCCTAATTCAGCATCACGTATCAGGAGTCAATAAGCTTGTCTGTCCGTCTGTATTTATCA  
TCTCTTTCGTGCTACTATCACCTCCCCTTTTCTTATGGATTTTTCTGTAAAAAACAAAAAGGAACAGGTAACCCA  
CTTGAATTAGGACACCAATGTAGGTGCCACCACCCGTTTCCTTCTGTTGAGTGTGCACGCTTATTGGTTCAACCTCA  
GAATTAATTTCTCATAATCCCCTGTTGAGAGAAAATTATAATAGACAAATCAAATTGTGTGGACTTGCCATTTCCC  
AAAACATTTTCATTTTGTGCGCGTGTGGGTGGTGGGGTGCCTTTTATTAGAATGAAGACTGTAAAAAGAGGAGT  
GTAGGATGATAAGAAGTAGTAAATGTCAGTTGTCAAAAAGATGAAAAGCAACGGAGGAAGGGACCAAACCTTGAC  
CTATGGAAAAGTGTGCTATGGTAATTATTGTCACAGGATTTAGGATGATTAATAATAGTTCGGACCACAAATAA  
ACAGCTTTAAGAAGTTCAACTTTCCCCACGGATAGCAAATTTGTTGGACCATCTTTGATGAAAGTCCCAATCTC  
ATAATTGCCAACCTTTTTTATACGAAACTAGTATTTTATAATTATCAAGAATCTTCAACTCATCAGTGATCGCTCAT  
TTCTGATTAAGAAAAAAAAGGGTGAGTAAATGAATCCATTTTGTCTGTTCTCCATGG

**HR2:DD38**

ATGTCGTGCTTAGCACGTGATGCATCATAGATGCGGTAAATTACTTTCTGTGACTGGGACAATGTGCTCCTCCA  
GTGGCCACGTATCGGTAAACCTTGTGCCAGAACACTAATATTTATATAATCAACAATAAAGAATGGTAAGCATTAG  
ACAAAGACAAAAACAATTTTTAATAATTTACCTGTACTAATTAGAAGGGTTTGATTTAATTTTATAAACTTAACAT  
GTGCAATATGTCCCTTTGTTTAGAGGAAAACAATTACGGTATTTCTTACTAACGTAAACTCTGAATATAATCATA  
ATCTGTATTCTGAAAAAGAAAAAGAACTAGAGATAAAAAGCGTAGAAACAACAGTATGTGGTCATAGTCATACAC  
GTAAAGGGATGAAAATTGAAAATAGAACCTGCAGGAATAAGTTTGCATTTAATTTGGATATATATCTTGAAGTGT  
AAGGTTAACCTCTCAGCTATTAATAGTACTACTACTAACTCAAATAGTACTTCTACTAGCACTCACGGTAACAA  
TCTCTTAGTAGGGATGGGAATAGGCCAGATCGGCCTACAGGGGTCTACGACTTGA

**GM-DD51-CR2**

GTAATGTACGTTGTTGTGTG

**HR1:DD51**

AAGACCTACAAAACAATGATCCCGACGCTAAAGTAAGTACGAGAGTTAAGAGAATAAATGGGAAAATATGCATA  
CATGATTAGGTGTGTGTTCTCAAGAAAGTACGAATGAATATGGTGTGTTGTAGTACATGAATGATGTGTTTT  
GAGGGTTCAAGGGAAATTGATATTTATAGAGTGAATGGAACCAGAGGTCTTTGTTGACAAGGGTTGTTATGACT  
CTTGCAAATAATTAAGCTTATAAATAATAGCCAATAACTTATTATAGATAGAGTTAGAGATAATATATAGCTAAA  
TTTGAACAAGGCATACAAAACAATAATGCTAAATATGAATAAGACAATCAAATTTAGTGTGATGTTCAACTCTTT  
GTCGTTGAAGAACTTGTGTCAGTGGTATAGTAAATGGGTGTGAGTGCAGTGTCTACCCATCTCACACCACACAA

CCAACCTCATATCTAAAGATATTGTCGCTGAATACAAAATTGAGTTATGGAATATACAATTCATAATATAGATACGA  
AAAATCATTCTTACAAAACATTCAATCAAAAATTATTCAAACATAATTCTAGATTAAGTAATCCGAAGTACAAGTT  
AGTATCCTAGATCCGTTAATTTAAAATTATGTTTGCATAATTTGGATTTGGTGTCTATAAGGGCACAATTTGTTC  
ATTCTTACAAGTTTGTCAATTCTAAAATATATGCAAATTTGAAGAAAAAAAATTTACGAATGTGTCTCAAACAATAA  
CTTAATGGGAGGAGAATGAGGGATGAAGAAGCTCAAAATTACCAACGCCTTCTACCTCAAGAAGCTACTTCACAC  
AAAATATGACTGGCGGAAGGATAGGGGACAACCGATAACGAGAAGGAGATACATAAGGTAATGTACGTTGTTGT

**HR2:DD51**

GTGAGGTACACAATTATGGGGATGAAGAAGTTCAACTTTAGTCGAAAAAATGTTTGAGAGGAACTTATGAAGAAT  
GTAATGGCAATTAAGATTTTTAAAATTATGAAGGTGCAGATAATAAATTGTGGGATGTAGGAAGCAAGTGCCTTA  
TACTTGAACCTTACTGCCAACATTCGGGACCCAAAAACAAATTCTCCAAAGTCCAAATCATTAGAATTTCTTGTG  
AATGATCTTAAAATTCTTAATTGTAACTTTTAACTTTTCATTAGCACTAATACTAAAAGAAGCTAAACAAATTTGTAA  
CTCAGCTTAGCATTGCCTGCAATCGCACAAAGCATGGGTGATTGATCCATTTCTTTGATTGACCATATTTTTTTCCCA  
GTTTCTGAGGTAAAAACACAAGCATTGCGTATTGATCCATTTCTTTGATTGTCACATTTTTTTCCCTCCAGCTTACT  
ATACCAGGTTGTAAGAATTAAGGTTAAGTTTCCAATGGTTTGTGCTGATCCGCACCAAGATGTTCAATTTGTGTTG  
AAAAATCCATACAATTACGCCATTCTCTCGACAAGCATGGTCAAAATCATCATCTTGCTTGTCAAAAAATTACCGC  
TTCGACGATAGTATCTCCATTTTAAATTGACCAATGTTTTAAGTGTTTTACATTGATTAAGAAGAATCATAAATAA  
GTTATTTATTGAAGTAGTTTTACCAAATATTTATACTTTGTATAAATGTATTACCCGATTTTATTGGGTGATTTATG  
TACTAGTTGAAAAATTAATAAACACAATACTAAAAAGCTATTATATTGGTGAATTTATTGGATAACTTTAAAAT  
AAAATTTAATATCTCATTGAAAACAAAAATATTAGTTAACATTTTTTAAATTAATTAATTTAGCCATTTTAGAAT  
AGAGGGAATAAGTATTA

**GM-U6 TERM**

TTTTTT

Supplementary Table S1: Description of vector components

| Component type                            | Label                                                  | Description                                                                                                              | Reference/Sequence                |
|-------------------------------------------|--------------------------------------------------------|--------------------------------------------------------------------------------------------------------------------------|-----------------------------------|
| <b>Promoter, introns and 5' Sequences</b> | GM-EF1A2PRO/5'UTR/INTRON1                              | Putative promoter 5'UTR and intron of a soybean elongation factor EF1A homolog PS0333268.                                | U.S. Patent No. 8697857           |
|                                           | GM-MTH1 PRO                                            | Putative promoter for soybean gene Glyma.07G132000 (Alias GlymaD7g15800) which encodes a metallothionein protein homolog | US20120005791A1                   |
|                                           | GM-UBQ PRO/5'UTR/INTRON1                               | Putative promoter, 5'UTR and intron of a soybean                                                                         | NCBI Accession D16248             |
|                                           | AT-UBI10 PRO/5'UTR/INTRON1                             | Arabidopsis Ubiquitin 10 promoter, 5'UTR and intron                                                                      | [1]                               |
|                                           | GM-U6-13.1 PRO                                         | Soybean U6 snRNA gene polymerase III promoter                                                                            | US20190376074A1 (SEQ ID. 120)     |
|                                           | GM-SAMS PRO                                            | Soybean 5-adenosyl-L-methionine synthetase promoter and                                                                  | US20030226166A1                   |
|                                           | ST-LS1 INTRON2                                         | POTATO LS1 INTRON 2                                                                                                      | [8]                               |
| <b>Terminator and 3' Sequences</b>        | UBQ3 TERM                                              | Ubiquitin-3 (UBQ3) 3'UTR and terminator from <i>Arabidopsis thaliana</i>                                                 | NCBI Accession L05363             |
|                                           | GM-U6 TERM                                             | Soybean U6 snRNA gene polymerase III terminator                                                                          | Supplementary Figure 2            |
|                                           | UBQ14 TERM                                             | Ubiquitin-14 (UBQ14) 3'UTR and terminator from <i>Arabidopsis thaliana</i>                                               | NCBI Accession NM_001203736       |
|                                           | NOS TERM                                               | Nopaline synthase terminator from <i>Agrobacterium tumefaciens</i>                                                       | [7]                               |
|                                           | PINII TERM                                             | The potato proteinase inhibitor II (pinII) 3' sequence                                                                   | [2]                               |
| <b>Coding sequences</b>                   | Zsyellow                                               | The Zs-Yellow1 N1 gene encoding a yellow fluorescent protein from <i>Zaanthus sp.</i>                                    | [3]                               |
|                                           | Dsred                                                  | The red fluorescent protein (DSRED) derived from <i>Discosoma spp.</i> , from Clontech                                   | [3]                               |
|                                           | SPCN                                                   | Spectinomycin                                                                                                            | Genebank protein ID - AAD50455.1. |
|                                           | CAS9 EXON1                                             | First 375 bps of soy codon optimized CAS9 gene from <i>Streptococcus pyogenes</i>                                        | [4]                               |
|                                           | CAS9 EXON2                                             | Last 3732 bps exon 2 of soy codon optimized CAS9 gene from <i>Streptococcus pyogenes</i>                                 | [4]                               |
|                                           | AT-NLS                                                 | Arabidopsis gene encoding peptide PKKKRKV that is a nuclear localization signal;                                         | At3g04980 (amino acid 3118-324)   |
|                                           | VIRD2 NLS                                              | Canola cotton optimized C-terminal nuclear localization signal from <i>VIRD2 Agrobacterium tumefaciens</i>               | [5]                               |
| HPT                                       | Hygromycin phosphotransferase gene from <i>E. coli</i> | [6]                                                                                                                      |                                   |
| <b>Other sequences</b>                    | GM-DD38-CR1                                            | 20 bp targeting spacer sequence of a guide RNA targeting the DD38 site on chromosome 4                                   | Supplementary Figure 2            |
|                                           | GM-DD51-CR2                                            | 21 bp targeting spacer sequence of a guide RNA targeting the DD51 site on chromosome 4                                   | Supplementary Figure 2            |
|                                           | HR1:DD38                                               | Homology arm1 sequence used in DD38 donor                                                                                | Supplementary Figure 2            |
|                                           | HR2:DD38                                               | Homology arm2 sequence used in DD38 donor                                                                                | Supplementary Figure 2            |
|                                           | HR1:DD51                                               | Homology arm1 sequence used in DD51 donor                                                                                | Supplementary Figure 2            |
|                                           | HR2:DD51                                               | Homology arm2 sequence used in DD51 donor                                                                                | Supplementary Figure 2            |

1 Norris, S.R., S.E. Meyer, and J. Callis, The intron of Arabidopsis-Thaliana Polyubiquitin Genes Is Conserved in Location and Is a Quantitative Determinant of Chimeric Gene-Expression. *Plant Molecular Biology*, 1993. 21(5): p. 895-906.

2 An, G., et al., Functional analysis of the 3' control region of the potato wound-inducible proteinase inhibitor II gene. *Plant Cell*, 1989. 1(1): p. 115-22.

3 Matz, M.V., et al., Fluorescent proteins from nonbioluminescent Anthozoa species. *Nat Biotechnol*, 1999. 17(10): p. 969-73.

4 Jinek, M., et al., A programmable dual-RNA-guided DNA endonuclease in adaptive bacterial immunity. *Science*, 2012. 337.

5 Mysore, K.S., et al., Role of the *Agrobacterium tumefaciens* VIRD2 protein in T-DNA transfer and integration. *Mol Plant Microbe Interact*, 1998. 11(7): p. 668-83.

6 van den Elzen P.J., Townsend, J., Lee, K.Y. and Bedbrook, J.R. A chimeric hygromycin resistance gene as a selectable marker in plant cells. *Plant Mol Biol*. 1985 5(5):299-302.

7 Depicker, A, Stachel, S, Dhase, P., Zambnyski, P., and Goodman H.M. Nopaline synthase: transcript mapping and DNA sequence. *J Mol Appl Genet*, 1982 1(6):561-573

8 Eckes, P., Rosahl, S., Schell, J and Willmitzer, L. Isolation and characterization of a light-inducible, organ-specific gene from potato and analysis of its expression after tagging and transfer into tobacco and potato shoots. *Mol Gen Genet*, 1986 205:14-22

**Supplementary Table S2.** Primers and probes used for qPCR detection of transgene

| <b>Q-PCR Assay*</b> | <b>Amplicon size (bp)</b> | <b>Forward Primer</b>   | <b>Reverse Primer</b>   | <b>Probe</b>                  |
|---------------------|---------------------------|-------------------------|-------------------------|-------------------------------|
| PSA2                | 63                        | CATGAAGCGCTCACGGTACTAT  | TCGTACGCTACTGCCACCAA    | FAM-ACGGTTAGCTTCACGACT        |
| PSN2                | 86                        | CTAAAAACGGCCCTAACTAACG  | GCCCCTAGTCGTCGTGTGT     | FAM-TTGCCCGCTAGATTAGTCCCCCGTT |
| PSB1                | 66                        | TGATTCCGATGACTTCGTAGGTT | GCTAATCGTAAGTGACGCTTGGA | FAM-TAGCTCAAGCCGCTCG          |
| SPCN                | 86                        | CTGCCCGCAATGCTCTTT      | ATTACCACTGGACCGTCACAGA  | FAM-ACAGTTGCGAACCAAGGTCTCCCG  |
| HPT                 | 65                        | CAGCGAGAGCCTGACCTATTG   | CAGGCAGGTCTTGCAACGT     | FAM-ATCTCCCGCCGTGCACAGGG      |

\*Labels match maps in Supplementary Figure 1

**Supplementary Table S3.** Primers and probes used for gene targeting and mutation analyses

| Site | Assay            | Forward Primer                                              | Reverse Primer                                                   | Probe                                             |
|------|------------------|-------------------------------------------------------------|------------------------------------------------------------------|---------------------------------------------------|
| DD38 | HR1 junction PCR | CTTCAGTTGTTACCATCTGTGTTTTCC                                 | AGTATGATTGGTAAGGAAGATATCCATG                                     | None                                              |
|      | HR2 junction PCR | GATTAGAGTCCCGCAATTATACATTTAATACGCG                          | TTGAGCCTAATCTTTTAAGTAAATAGGTC                                    | None                                              |
|      | Mutation         | TCCATTTTGTCTGTTCTCCATGGATG                                  | CACATTGTCCCAGTCACAGAAAG                                          | FAM-AGATGCCGGTAAATTAT                             |
| DD51 | HR1 junction PCR | F1:ATGTCGAAGTGAGAGTGATTTTATTGA<br>F2:CATGAAGCGCTCACGGTACTAT | R1:AGACATGCAATGCTCATTATCTCTAG<br>R2:GGAACTATAGCTAAGTCGTACGCTACTG | FAM-ACGGTTAGCTTCACGACT                            |
|      | HR2 junction PCR | F1:TGATTCCGATGACTTCGTAGGTT<br>F2:GCTAATCGTAAGTGACGCTTGGA    | R1:TGGGGTTGAGTTAGGTCTCTCATC<br>R2:TGATTCCGATGACTTCGTAGGTT        | FAM-CTAGCTCAAGCCGCTC                              |
|      | Mutation         | GACAACCGATAACGAGAAGGAGAT                                    | GCCATTACATTCTTCATAAGTTCCTCT                                      | FAM-CGTTGTTGTGTGAGGTAC<br>VIC-GACTAAAGTTGAACTTCT) |
